# Supplementary material for: Rare-event sampling of epigenetic landscapes and phenotype transitions
Source: PLOS journal article supplement (doi:10.1371/journal.pcbi.1006336), 2018-08-03
Supplement: S15 (10.1371/journal.pcbi.1006336.s015) [file journal.pcbi.1006336.s015]

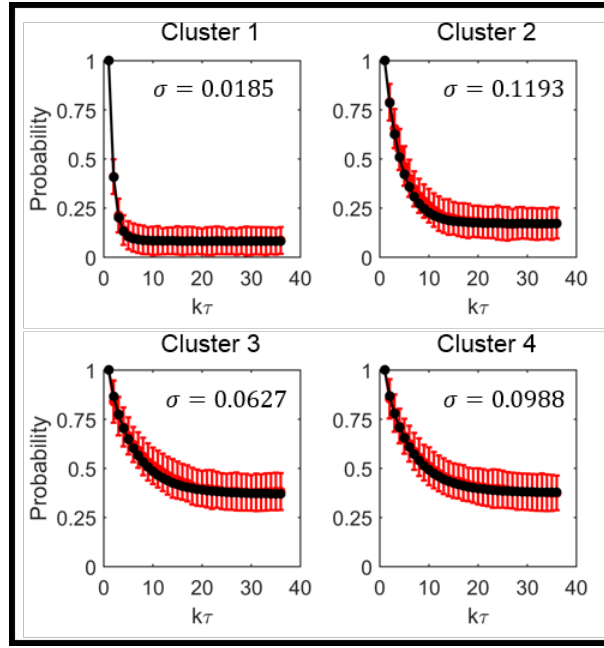

**Fig 1. The Chapman-Kolmogorov test on the four Markov State Model phenotypes of the sampled ExMISA network.** The relaxation curves and variance of a  $1000\tau$  trajectory are shown in red. The relaxation curve predictions from the MSM transition matrix is shown in black. The total error  $\sigma$  is measured as the 2-norm containing the differences between the two estimates of the relaxation curve.
